# Supplementary material
Source: PubMed Central journal article supplement (PMC4030227)
Supplement: ismej2013232x1.pdf [file ismej2013232x1.pdf]

**Table S1. Dry cell weights in g L<sup>-1</sup> of *P. aeruginosa* PA14 grown on different carbon sources.**

| <b>Substrate</b> | <b>Aeration condition</b> | <b>Dry cell weight (g L<sup>-1</sup>)</b> |
|------------------|---------------------------|-------------------------------------------|
| Lactate          | Microaerobic              | 0.094 ± 0.007                             |
| Acetate          | Microaerobic              | 0.086 ± 0.008                             |
| Ethanol          | Microaerobic              | 0.074 ± 0.01                              |
| 2,3-butanediol   | Microaerobic              | 0.077 ± 0.008                             |
|                  | Aerobic                   | 0.159 ± 0.01                              |
| Glucose          | Microaerobic              | 0.113 ± 0.008                             |
|                  | Aerobic                   | 0.782 ± 0.074                             |
