# Supplementary material
Source: PubMed Central journal article supplement (PMC4030227)
Supplement: ismej2013232x2.pdf [file ismej2013232x2.pdf]

**Table S2. List of all statistically significantly changed proteins in a comparative proteomics analysis of *P. aeruginosa* PA14 cells grown aerobically in AB medium with 2,3-butanediol or glucose as carbon source, respectively.**

| Functional category                                | Label                                                                                         | log (B/G)<br>down | log (B/G)<br>up |
|----------------------------------------------------|-----------------------------------------------------------------------------------------------|-------------------|-----------------|
| Quorum sensing/Virulence factors/Biofilm formation | PA14_30800 Putative nitroreductase                                                            | -0.854            |                 |
|                                                    | PA14_18180 Putative antibiotic biosynthesis monooxygenase                                     | -0.750            |                 |
|                                                    | PA14_61390 Putative lipoprotein                                                               | -0.658            |                 |
|                                                    | PA14_27460 Thiopurine methyl transferase                                                      | -0.398            |                 |
|                                                    | PA14_28450 Ecotin precursor                                                                   |                   | 0.336           |
|                                                    | PA14_7650 Putative sporulation protein                                                        |                   | 0.406           |
|                                                    | PA14_65000 Azurin precursor                                                                   |                   | 0.444           |
|                                                    | PA14_62420 Zinc metallo peptidase                                                             |                   | 0.484           |
|                                                    | PA14_1490 Putative hemolysin                                                                  |                   | 0.486           |
|                                                    | PA14_69370 Alginate regulatory protein AlgP                                                   |                   | 0.496           |
|                                                    | PA14_36980 Putative outer membrane protein                                                    |                   | 0.568           |
|                                                    | PA14_56070 Transcriptional regulator MvaT P-16 subunit                                        |                   | 0.582           |
| Transporter                                        | PA14_3930 Putrescine ABC transporter putrescine-binding protein potF                          | -0.575            |                 |
|                                                    | PA14_62650 TolA protein                                                                       | -0.399            |                 |
|                                                    | PA14_16510 Peptide chain release factor 2                                                     | -0.368            |                 |
|                                                    | PA14_68260 TRAP-type C4-dicarboxylate transport system, periplasmic component                 |                   | 0.328           |
|                                                    | PA14_51810 FIG000859 (not subsystem-based): hypothetical protein                              |                   | 0.372           |
|                                                    | PA14_21175 Phosphonate ABC transporter phosphate-binding periplasmic component                |                   | 0.399           |
|                                                    | PA14_46910 Glutamate Aspartate periplasmic binding protein precursor gtlI                     |                   | 0.407           |
|                                                    | PA14_50520 High-affinity leucine-specific transport system, periplasmic binding protein livK  |                   | 0.415           |
| Transporter                                        | PA14_52790 Arginine/ornithine ABC transporter, periplasmic arginine/ornithine binding protein |                   | 0.448           |
|                                                    | PA14_45930 GGDEF and EAL domain proteins                                                      |                   | 0.454           |
|                                                    | PA14_24020 General secretion pathway protein G                                                |                   | 0.501           |
|                                                    | PA14_67840 Glutamate ABC transporter, periplasmic glutamine-binding protein                   |                   | 0.579           |
|                                                    | PA14_57840 Uncharacterized ABC transporter, auxiliary component YrbC                          |                   | 0.613           |
|                                                    | PA14_64900 Branched-chain amino acid ABC transporter, amino acid-binding protein              |                   | 0.646           |
|                                                    | PA14_7870 ABC transporter, periplasmic spermidine putrescine-binding protein potD             |                   | 0.656           |
|                                                    | PA14_46220 Putrescine ABC transporter putrescine-binding protein potF                         |                   | 1.113           |
|                                                    | PA14_54540 Putative tricarboxylic transport TetC                                              |                   | 1.122           |
|                                                    | PA14_68070 Arginine/ornithine ABC transporter, periplasmic arginine/ornithine binding protein |                   | 1.210           |
|                                                    | PA14_39350 Ribose ABC transport system, periplasmic ribose-binding protein RbsB               |                   | 1.367           |
|                                                    | PA14_14390 Putative ABC-type transport protein periplasmic c                                  |                   | 1.399           |

|                                         |                                                                           |        |       |
|-----------------------------------------|---------------------------------------------------------------------------|--------|-------|
|                                         | PA14_73120 Putative periplasmic transport protein                         |        | 1.501 |
|                                         | PA14_33530 Putative ABC transporter periplasmic substrate binding protein |        | 1.501 |
|                                         | PA14_67850 ABC type amino acid transport protein periplasmic component    |        | 1.656 |
| Structure                               | PA14_14910 Outer membrane protein YfgL,                                   | -0.832 |       |
|                                         | PA14_68200 Glucose-1-phosphate thymidyltransferase                        | -0.758 |       |
|                                         | PA14_68210 dTDP-4-dehydrorhamnose 3,5-epimerase                           | -0.548 |       |
|                                         | PA14_50930 type IV pilus biogenesis protein PilE                          |        | 0.307 |
|                                         | PA14_63030 Outer membrane lipoprotein SmpA,                               |        | 0.447 |
| Structure                               | PA14_30310 Outer membrane lipoprotein carrier protein LolA                |        | 0.561 |
| Stress Response                         | PA14_34460 Alkylhydroperoxidase                                           | -1.775 |       |
|                                         | PA14_67090 Glucans biosynthesis protein G precursor                       | -0.775 |       |
|                                         | PA14_56590 Universal stress protein family 4                              | -0.647 |       |
|                                         | PA14_68380 ADP compounds hydrolase NudE                                   | -0.565 |       |
|                                         | PA14_56940 Copper sensory histidine kinase CusS                           | -0.503 |       |
|                                         | PA14_4730 Gamma-glutamyltranspeptidase                                    | -0.409 |       |
|                                         | PA14_21220 Universal stress protein family                                | -0.332 |       |
|                                         | PA14_48590 Trans-aconitate 2-methyltransferase                            | -0.304 |       |
|                                         | PA14_62970 Chaperone protein DnaK                                         |        | 0.339 |
|                                         | PA14_24770 Probable transmembrane protein                                 |        | 0.368 |
|                                         | PA14_70740 Probable transmembrane protein                                 |        | 0.577 |
|                                         | PA14_49410 Cold shock protein                                             |        | 1.368 |
| PA14_21760 Cold acclimation protein B   |                                                                           | 1.577  |       |
| Regulation                              | PA14_73020 C4-type zinc finger protein, DksA/TraR family                  | -1.099 |       |
|                                         | PA14_23720 Putative translation initiation inhibitor, yjgF family         | -0.440 |       |
|                                         | PA14_64930 Nudix-related transcriptional regulator NrtR                   | -0.390 |       |
|                                         | PA14_25800 Transcriptional regulator, TetR family                         | -0.390 |       |
|                                         | PA14_65280 HflK protein                                                   | -0.306 |       |
|                                         | PA14_52570 Carbon storage regulator                                       |        | 0.376 |
| PA14_41250 Cell division trigger factor |                                                                           | 0.397  |       |
| Redox                                   | PA14_22710 Coenzyme F420-1:L-glutamate ligase                             | -0.759 |       |
|                                         | PA14_14680 Myo-inositol-1(or 4)-monophosphatase                           | -0.576 |       |
|                                         | PA14_69420 Homolog of E. coli HemY protein                                | -0.545 |       |
|                                         | PA14_23380 UDP-N-acetyl-D-mannosaminuronate dehydrogenase                 | -0.503 |       |
| Redox                                   | PA14_46980 Signal transduction histidine kinase HoxJ                      | -0.463 |       |
|                                         | PA14_15120 Copper metallochaperone, bacterial analog of Cox17 protein     | -0.374 |       |
|                                         | PA14_20140 Ferredoxin--NADP(+) reductase                                  | -0.334 |       |
|                                         | PA14_69970 membrane c-type cytochrome cy                                  |        | 0.305 |
|                                         | PA14_31810 Thiol peroxidase, Tpx-type                                     |        | 0.337 |
|                                         | PA14_69200 Thioredoxin                                                    |        | 0.424 |
|                                         | PA14_14750 Iron binding protein IscA for iron-sulfur cluster assembly     |        | 0.557 |
| PA14_51980 Arsenate reductase           |                                                                           | 0.692  |       |

|                        |                                                                                               |        |       |
|------------------------|-----------------------------------------------------------------------------------------------|--------|-------|
|                        | PA14_29020 Biotin synthesis protein bioH                                                      |        | 0.778 |
| Phosphorous metabolism | PA14_28960 PhnB protein                                                                       | -0.305 |       |
|                        | PA14_46830 PhnB protein                                                                       |        | 0.341 |
|                        | PA14_2450 NAD(P) transhydrogenase alpha subunit                                               |        | 0.493 |
|                        | PA14_11690 Inorganic pyrophosphatase                                                          |        | 0.537 |
|                        | PA14_64460 Phosphate starvation inducible protein                                             |        | 1.537 |
| Phenazines             | PA14_39960 Phenazine biosynthesis protein PhzB                                                |        | 0.487 |
|                        | PA14_9420 Phenazine biosynthesis protein PhzF                                                 |        | 0.550 |
| Chemotaxis/Motility    | PA14_30700 Chemotaxis protein methyltransferase CheR                                          | -1.413 |       |
|                        | PA14_68400 Flagellar hook-length control protein fliK                                         | -0.343 |       |
|                        | PA14_67010 Aerotaxis sensor receptor protein                                                  | -0.338 |       |
|                        | PA14_58390 Dipeptide-binding ABC transporter, periplasmic substrate-binding component         |        | 0.366 |
|                        | PA14_61200 Flagellar hook-length control protein fliK                                         |        | 0.482 |
|                        | PA14_58350 Dipeptide-binding ABC transporter, periplasmic substrate-binding component         |        | 0.589 |
|                        | PA14_45810 Flagellar biosynthesis protein fliL                                                |        | 0.808 |
| Chemotaxis/Motility    | PA14_69100 Flagellar biosynthesis protein fliL                                                |        | 0.822 |
| Metabolism             | PA14_53250 Chitin binding protein                                                             | -1.080 |       |
|                        | PA14_71720 Pyruvate carboxyl transferase subunit B                                            | -0.956 |       |
|                        | PA14_67500 Lactoylglutathione lyase                                                           | -0.907 |       |
|                        | PA14_22910 Phosphogluconate dehydratase                                                       | -0.777 |       |
|                        | PA14_49660 Beta-galactosidase                                                                 | -0.691 |       |
|                        | PA14_15340 GMP synthase                                                                       | -0.587 |       |
|                        | PA14_37570 Benzoate 1,2-dioxygenase (EC 1.14.12.10)                                           | -0.578 |       |
|                        | PA14_27960 Transaldolase (EC 2.2.1.2)                                                         | -0.472 |       |
|                        | PA14_25080 Enoyl-CoA hydratase (EC 4.2.1.17)                                                  | -0.471 |       |
|                        | PA14_53220 Fumarate hydratase class II (EC 4.2.1.2)                                           | -0.449 |       |
|                        | PA14_54470 YgfY COG2938                                                                       | -0.434 |       |
|                        | PA14_25660 3-oxoacyl-[acyl-carrier protein] reductase (EC 1.1.1.100)                          | -0.431 |       |
|                        | PA14_41670 Phosphoenolpyruvate synthase (EC 2.7.9.2)                                          | -0.399 |       |
|                        | PA14_8460 Enoyl-[acyl-carrier-protein] reductase [FMN] (EC 1.3.1.9)                           | -0.398 |       |
|                        | PA14_56240 Pyruvate kinase (EC 2.7.1.40)                                                      | -0.383 |       |
|                        | PA14_57890 Arabinose 5-phosphate isomerase (EC 5.3.1.13)                                      | -0.370 |       |
|                        | PA14_66290 Pyruvate dehydrogenase E1 component (EC 1.2.4.1)                                   | -0.367 |       |
|                        | PA14_10290 Transcriptional activator of acetoin dehydrogenase operon acoR                     | -0.366 |       |
|                        | PA14_40830 Alcohol dehydrogenase (EC 1.1.1.1)                                                 | -0.356 |       |
|                        | PA14_27730 Acyl-CoA dehydrogenase, short-chain specific (EC 1.3.99.2)                         | -0.355 |       |
|                        | PA14_70370 Orotate phosphoribosyltransferase (EC 2.4.2.10)                                    | -0.354 |       |
|                        | PA14_71850 diguanylate cyclase/phosphodiesterase (GGDEF & EAL domains) with PAS/PAC sensor(s) | -0.353 |       |
| Metabolism             | PA14_57600 Putative oxido-reductase aldo-keto reductase family                                | -0.351 |       |

|                  |                                                                                                             |        |       |
|------------------|-------------------------------------------------------------------------------------------------------------|--------|-------|
|                  | PA14_21540 3-oxoacyl-[acyl-carrier-protein] synthase, KASIII (EC 2.3.1.41)                                  | -0.335 |       |
|                  | PA14_25090 Acetyl-CoA acetyltransferase (EC 2.3.1.9)                                                        | -0.331 |       |
|                  | PA14_25650 Malonyl CoA-acyl carrier protein transacylase (EC 2.3.1.39)                                      | -0.323 |       |
|                  | PA14_4150 Fumarylacetoacetate hydrolase family protein                                                      | -0.315 |       |
|                  | PA14_10250 Acetoin dehydrogenase E1 component beta-subunit (EC 1.2.4.-)                                     |        | 0.316 |
|                  | PA14_9550 6-phosphogluconolactonase (EC 3.1.1.31)                                                           |        | 0.329 |
|                  | PA14_49330 Candidate 1: diene lactone hydrolase                                                             |        | 0.347 |
|                  | PA14_11810 Aldehyde dehydrogenase (EC 1.2.1.3)                                                              |        | 0.398 |
|                  | PA14_10230 2,3-butanediol dehydrogenase, R-alcohol forming, (R)- and (S)-acetoin-specific (EC 1.1.1.4)      |        | 0.401 |
|                  | PA14_73280 ATP synthase delta chain (EC 3.6.3.14)                                                           |        | 0.435 |
|                  | PA14_73230 ATP synthase epsilon chain (EC 3.6.3.14)                                                         |        | 0.459 |
|                  | PA14_10260 Acetoin dehydrogenase E1 component alpha-subunit (EC 1.2.4.-)                                    |        | 0.485 |
|                  | PA14_64110 Biotin carboxylase of acetyl-CoA carboxylase (EC 6.3.4.14)                                       |        | 0.486 |
|                  | PA14_10280 Short-chain alcohol dehydrogenase associated with acetoin utilization                            |        | 0.615 |
|                  | PA14_10240 Dihydroliipoamide acetyltransferase component (E2) of acetoin dehydrogenase complex (EC 2.3.1.-) |        | 0.683 |
|                  | PA14_51170 Acetyl-CoA synthetase (ADP-forming) alpha and beta chains, putative                              |        | 0.736 |
|                  | PA14_24790 hydroxycinnamate specific porine                                                                 |        | 0.785 |
|                  | PA14_25670 Acyl carrier protein                                                                             |        | 0.797 |
|                  | PA14_38860 Quino(hemo)protein alcohol dehydrogenase, PQQ-dependent (EC 1.1.99.8)                            |        | 1.077 |
| Metabolism       | PA14_66875 Polyhydroxyalkanoate synthesis protein PhaF                                                      |        | 1.486 |
|                  | PA14_25900 Putative short chain alcohol-dehydrogenase                                                       |        |       |
| Iron acquisition | PA14_3800 Outer membrane porin, coexpressed with pyoverdine biosynthesis regulon                            | -0.967 |       |
|                  | PA14_9220 Pyochelin biosynthetic protein PchB                                                               | -0.589 |       |
|                  | PA14_42820 Isochorismatase (EC 3.3.2.1)                                                                     | -0.429 |       |
|                  | PA14_62300 Periplasmic hemin-binding protein                                                                | -0.356 |       |
|                  | PA14_33710 PvdO, pyoverdine responsive serine/threonine kinase                                              |        | 0.380 |
|                  | PA14_56830 Iron-regulated protein A precursor                                                               |        | 0.397 |
| DNA/RNA/protein  | PA14_70190 LSU ribosomal protein L28p                                                                       | -0.950 |       |
|                  | PA14_41380 Glutaminyl-tRNA synthetase (EC 6.1.1.18)                                                         | -0.749 |       |
|                  | PA14_19870 Leucine dehydrogenase (EC 1.4.1.9)                                                               | -0.742 |       |
|                  | PA14_70270 Phosphomannomutase (EC 5.4.2.8)                                                                  | -0.646 |       |
|                  | PA14_58630 ArPA14nine decarboxylase (EC 4.1.1.19)                                                           | -0.580 |       |
|                  | PA14_72520 Ribonucleotide reductase of class II (coenzyme B12-dependent) (EC 1.17.4.1)                      | -0.560 |       |
|                  | PA14_12400 Thiamin-phosphate pyrophosphorylase (EC 2.5.1.3)                                                 | -0.545 |       |
|                  | PA14_49870 Peptide deformylase (EC 3.5.1.88)                                                                | -0.505 |       |
|                  | PA14_5230 Cystathionine gamma-lyase (EC 4.4.1.1)                                                            | -0.475 |       |

|                                                 |                                                                            |        |       |
|-------------------------------------------------|----------------------------------------------------------------------------|--------|-------|
|                                                 | PA14_54640 Enoyl-CoA hydratase [valine degradation] (EC 4.2.1.17)          | -0.459 |       |
|                                                 | PA14_23320 Cytidylate kinase (EC 2.7.4.14)                                 | -0.449 |       |
|                                                 | PA14_54480 COG0354: Predicted aminomethyltransferase related to GcvT       | -0.440 |       |
|                                                 | PA14_28650 Threonyl-tRNA synthetase (EC 6.1.1.3)                           | -0.407 |       |
|                                                 | PA14_3450 5-aminovalerate aminotransferase (EC 2.6.1.48)                   | -0.403 |       |
|                                                 | PA14_70440 Guanylate kinase (EC 2.7.4.8)                                   | -0.403 |       |
| DNA/RNA/protein                                 | PA14_23110 Pseudouridine synthase family protein                           | -0.392 |       |
|                                                 | PA14_12080 Membrane-bound lytic murein transglycosylase B (EC 3.2.1.-)     | -0.390 |       |
|                                                 | PA14_25560 Ribonuclease E (EC 3.1.4.-)                                     | -0.389 |       |
|                                                 | PA14_51310 tRNA 5-methylaminomethyl-2-thiouridine synthase TusA            | -0.362 |       |
|                                                 | PA14_8760 DNA-directed RNA polymerase beta subunit (EC 2.7.7.6)            | -0.361 |       |
|                                                 | PA14_67810 Carboxyl-terminal protease (EC 3.4.21.102)                      | -0.356 |       |
|                                                 | PA14_8790 SSU ribosomal protein S12p (S23e)                                | -0.351 |       |
|                                                 | PA14_24445 NADP-specific glutamate dehydrogenase (EC 1.4.1.4)              | -0.347 |       |
|                                                 | PA14_24270 Membrane alanine aminopeptidase N (EC 3.4.11.2)                 | -0.341 |       |
|                                                 | PA14_64490 LSU ribosomal protein L21p                                      | -0.332 |       |
|                                                 | PA14_67110 Proline iminopeptidase (EC 3.4.11.5)                            | -0.326 |       |
|                                                 | PA14_12230 Leucyl-tRNA synthetase (EC 6.1.1.4)                             | -0.316 |       |
|                                                 | PA14_57580 SSU ribosomal protein S9p (S16e)                                | -0.311 |       |
|                                                 | PA14_66790 ATP-dependent hsl protease ATP-binding subunit hslU             | -0.303 |       |
|                                                 | PA14_20 DNA polymerase III beta subunit (EC 2.7.7.7)                       | -0.303 |       |
|                                                 | PA14_57010 Heat shock protein 60 family chaperone GroEL                    |        | 0.323 |
|                                                 | PA14_60460 LSU ribosomal protein L21p                                      |        | 0.326 |
|                                                 | PA14_8990 SSU ribosomal protein S8p (S15Ae)                                |        | 0.339 |
|                                                 | PA14_9000 LSU ribosomal protein L6p (L9e)                                  |        | 0.351 |
|                                                 | PA14_8940 SSU ribosomal protein S17p (S11e)                                |        | 0.353 |
|                                                 | PA14_45110 Sulfate and thiosulfate binding protein cysP                    |        | 0.353 |
|                                                 | PA14_30330 Seryl-tRNA synthetase (EC 6.1.1.11)                             |        | 0.366 |
|                                                 | PA14_21030 ATP-dependent Clp protease proteolytic subunit (EC 3.4.21.92)   |        | 0.375 |
| PA14_62900 Transcription elongation factor GreA |                                                                            | 0.405  |       |
| DNA/RNA/protein                                 | PA14_17050 Methionine aminopeptidase (EC 3.4.11.18)                        |        | 0.406 |
|                                                 | PA14_22450 Peptidyl-prolyl cis-trans isomerase ppiA precursor (EC 5.2.1.8) |        | 0.423 |
|                                                 | PA14_17060 SSU ribosomal protein S2p (SAe)                                 |        | 0.440 |
|                                                 | PA14_23330 SSU ribosomal protein S1p                                       |        | 0.444 |
|                                                 | PA14_21880 Tail-specific protease precursor (EC 3.4.21.102)                |        | 0.449 |
|                                                 | PA14_9010 LSU ribosomal protein L18p (L5e)                                 |        | 0.450 |
|                                                 | PA14_46970 L-asparaginase (EC 3.5.1.1)                                     |        | 0.452 |
|                                                 | PA14_62720 SSU ribosomal protein S15p (S13e)                               |        | 0.499 |
|                                                 | PA14_8720 LSU ribosomal protein L11p (L12e)                                |        | 0.584 |
|                                                 | PA14_41390 Peptidyl-prolyl cis-trans isomerase ppiB (EC 5.2.1.8)           |        | 0.658 |

|               |                                                                                      |        |       |
|---------------|--------------------------------------------------------------------------------------|--------|-------|
|               | PA14_70600 DNA-binding protein HU-alpha                                              |        | 0.682 |
|               | PA14_68860 Glycine cleavage system H protein                                         |        | 0.841 |
|               | PA14_44620 conserved protein of unknown function likely to be involved in DNA repair |        | 0.892 |
|               | PA14_8750 LSU ribosomal protein L7/L12 (L23e)                                        |        | 0.921 |
|               | PA14_9890 Peptidyl-prolyl cis-trans isomerase ppiC (EC 5.2.1.8)                      |        | 0.979 |
|               | PA14_65310 RNA-binding protein Hfq                                                   |        | 1.039 |
|               | PA14_27210 Translation elongation factor P                                           |        | 1.080 |
|               | PA14_8930 LSU ribosomal protein L29p (L35e)                                          |        | 1.110 |
|               | PA14_68710 TRANSCRIPTION ACCESSORY PROTEIN (S1 RNA binding domain)                   |        | 1.225 |
|               | PA14_ Putative ribosomal protein L25                                                 |        | 2.225 |
| Miscellaneous | PA14_30800 Putative nitroreductase                                                   | -0.854 |       |
|               | PA14_18180 Putative antibiotic biosynthesis monooxygenase                            | -0.750 |       |
| Miscellaneous | PA14_61390 Putative lipoprotein                                                      | -0.658 |       |
|               | PA14_27460 Thiopurine methyl transferase                                             | -0.398 |       |
|               | PA14_28450 Ecotin precursor                                                          |        | 0.336 |
|               | PA14_7650 Putative sporulation protein                                               |        | 0.406 |
|               | PA14_65000 Azurin precursor                                                          |        | 0.444 |
|               | PA14_62420 Zinc metallo peptidase                                                    |        | 0.484 |
|               | PA14_1490 Putative hemolysin                                                         |        | 0.486 |
|               | PA14_69370 AIPA14nate regulatory protein                                             |        | 0.496 |
|               | PA14_36980 Putative outer membrane protein                                           |        | 0.568 |
|               | PA14_56070 Transcriptional regulator MvaT P-16 subunit                               |        | 0.582 |
