# Supplementary material
Source: PubMed Central journal article supplement (PMC4030227)
Supplement: ismej2013232x3.pdf [file ismej2013232x3.pdf]

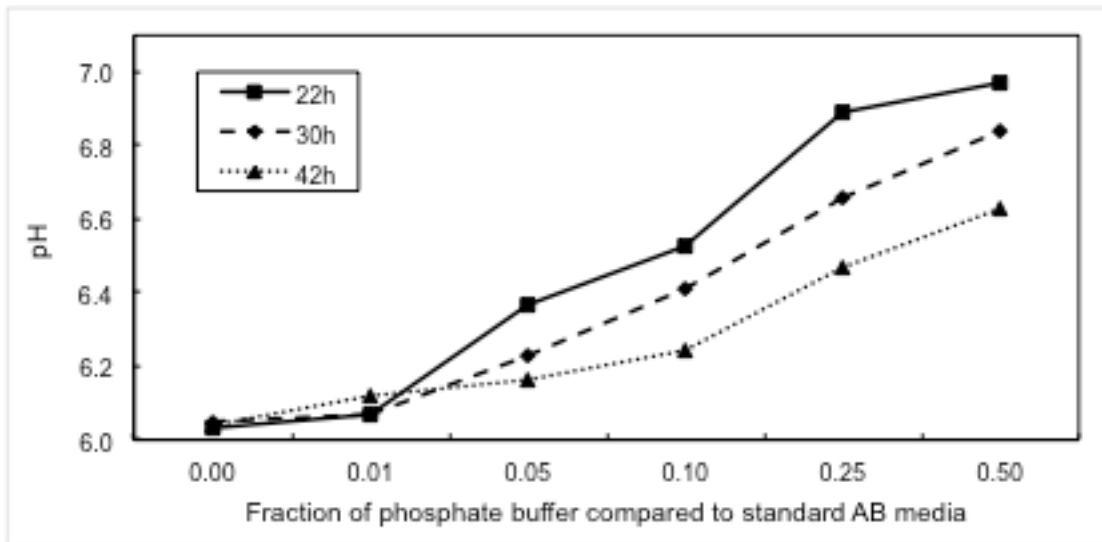

**Figure S1. Buffer experiment in AB medium with pure cultures of *P. aeruginosa* PA14 and 30 mM glucose at micro-aerobic conditions. The pH in the growth media was measured three times (22h, 30h, and 42h) and only dropped below 6.6 after 42h when the phosphate buffer concentration was 50% lower than the standard phosphate buffer concentrations in AB medium. The starting pH was 7.0.**
