# Supplementary material
Source: PubMed Central journal article supplement (PMC4030227)
Supplement: ismej2013232x4.pdf [file ismej2013232x4.pdf]

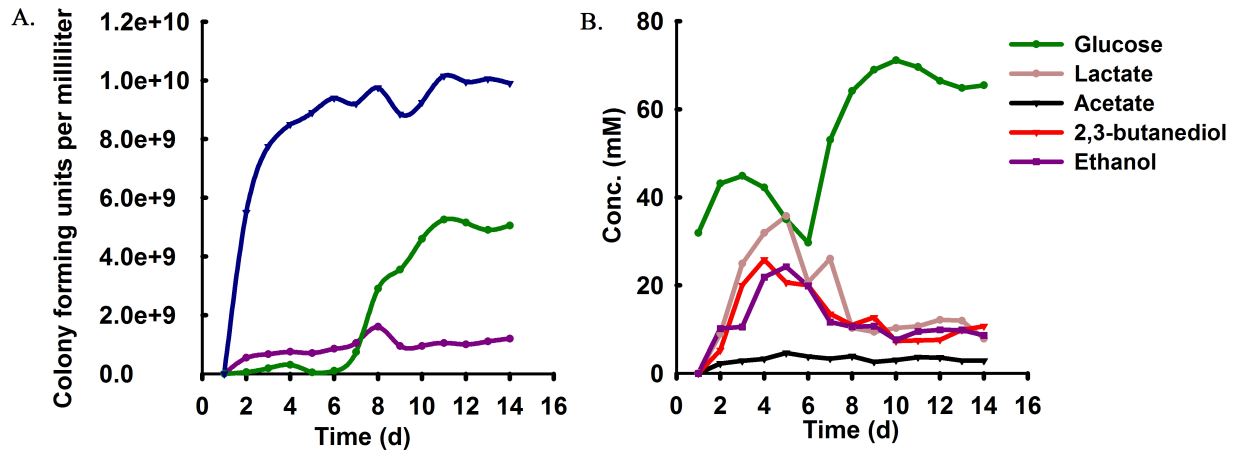

Figure S2. Biological replicate of Figure 2: (A) tracking the population of *S. marcescens* (purple) in a co-culture with *P. aeruginosa* (green) over the operating period, and the population of a pure culture of *S. marcescens* (blue) under similar operating conditions; and (B) metabolite profile of a co-culture of *S. marcescens* and *P. aeruginosa*
